# Supplementary material
Source: MDPI journal article supplement (https://www.mdpi.com/2073-4441/12/7/1949)
Supplement: s1 [file s1]

Article

# Localization of Groundwater Contaminant Sources Using Artificially Enhanced Catchment

Hang Zhao, Jia Zhang, Honghan Chen \*, Liyang Wang and Zhuze Yang

Supplementary Materials

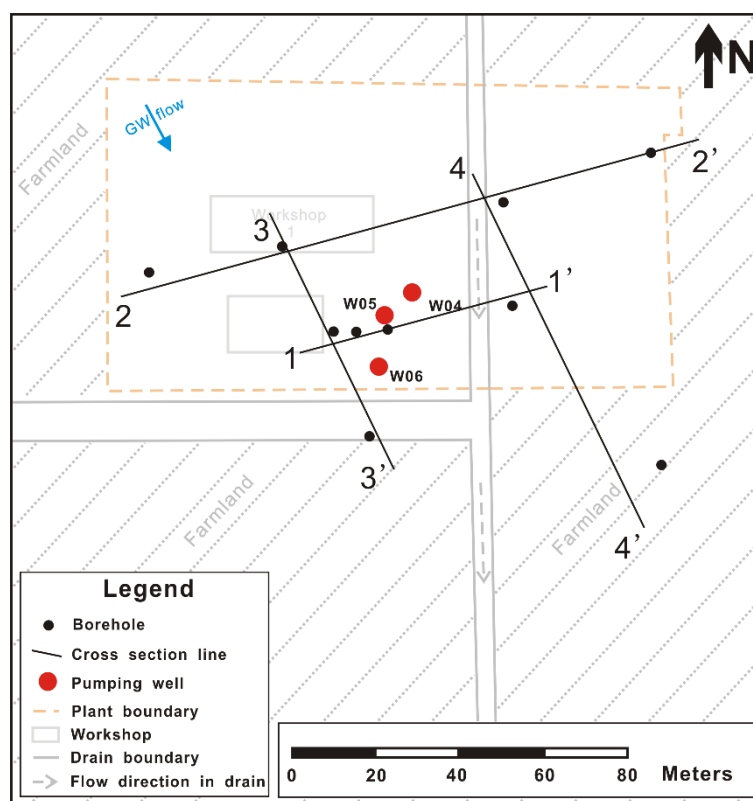

Figure S1. Cross sections location.

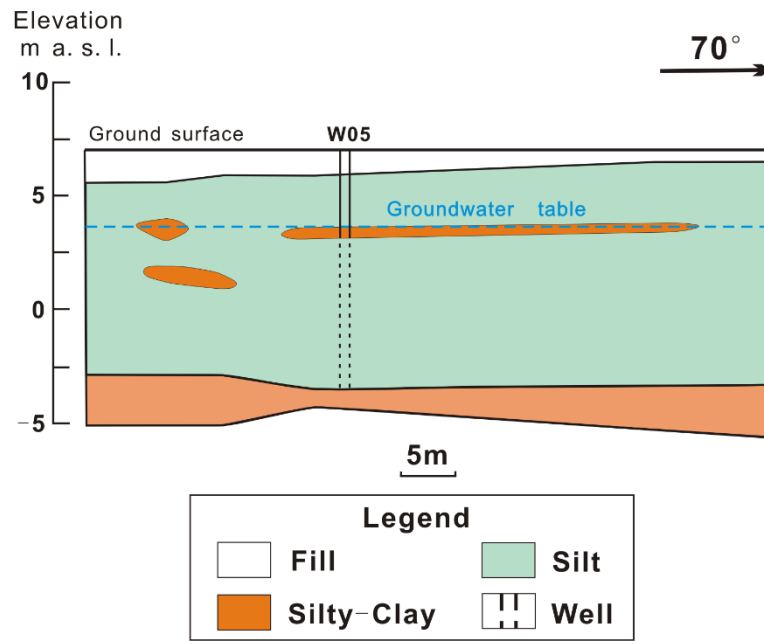

(a) Cross section 1-1'

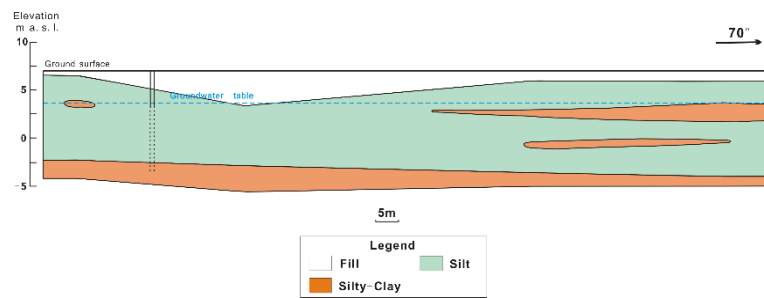

(b) Cross section 2-2'

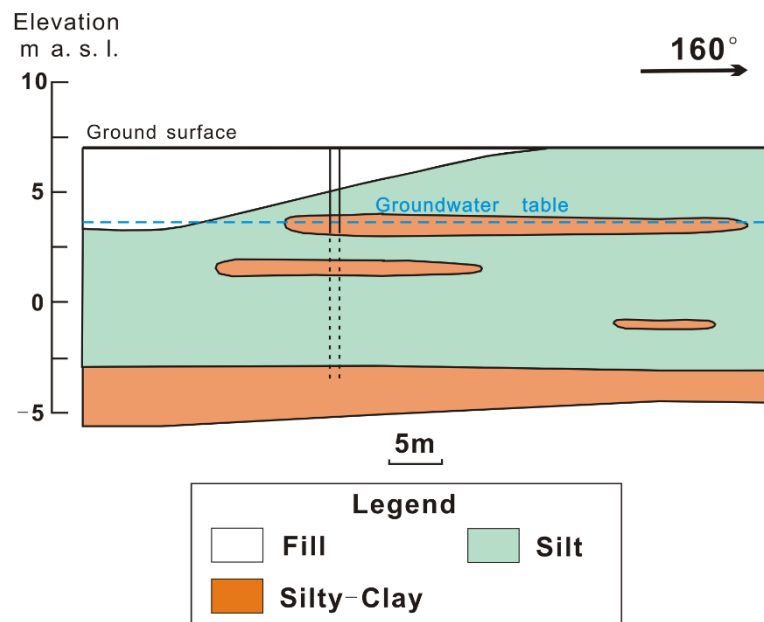

(c) Cross section 3-3'

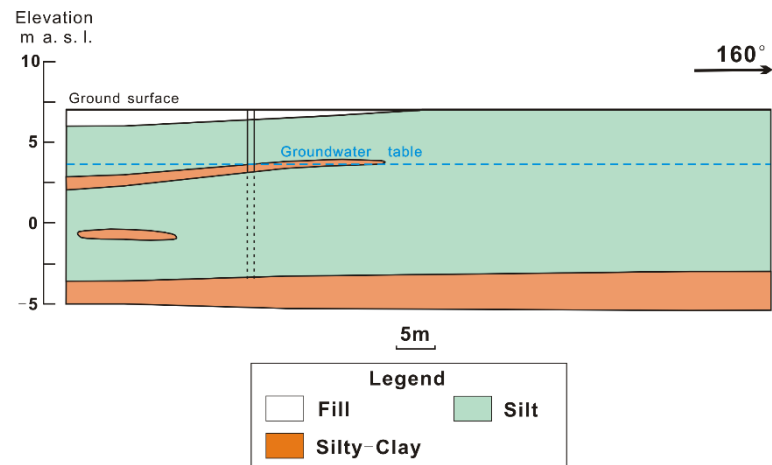

(d) Cross section 4-4'

Figure S2. Hydrogeological cross sections.

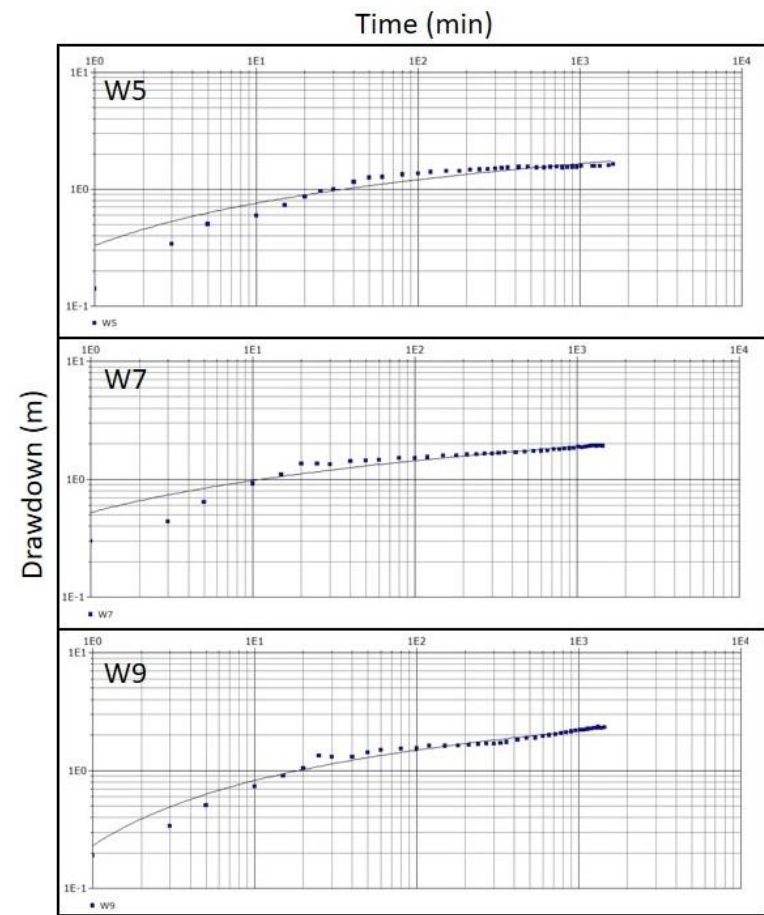

Figure S3. Measured points fitted by Theis standard curve.

Table S1. Pumping tests results.

| Well | Pumping rate (m³/h) | Analysis method | Hydraulic conductivity (m/s) |
|------|---------------------|-----------------|------------------------------|
| W5   | 0.470               | Theis           | $9.37 \times 10^{-6}$        |
| W7   | 0.744               | Theis           | $1.43 \times 10^{-5}$        |
| W9   | 0.467               | Theis           | $6.19 \times 10^{-6}$        |
